# Supplementary figures and images for: Direct visualization of alpha-synuclein oligomers reveals previously undetected pathology in Parkinson’s disease brain
Source: PubMed Central journal article supplement — Brain. 2015 Mar 1;138(6):1642–57. doi: 10.1093/brain/awv040 (PMC4614141; doi:10.1093/brain/awv040), 2015-03-01

## Supplementary Figure 2

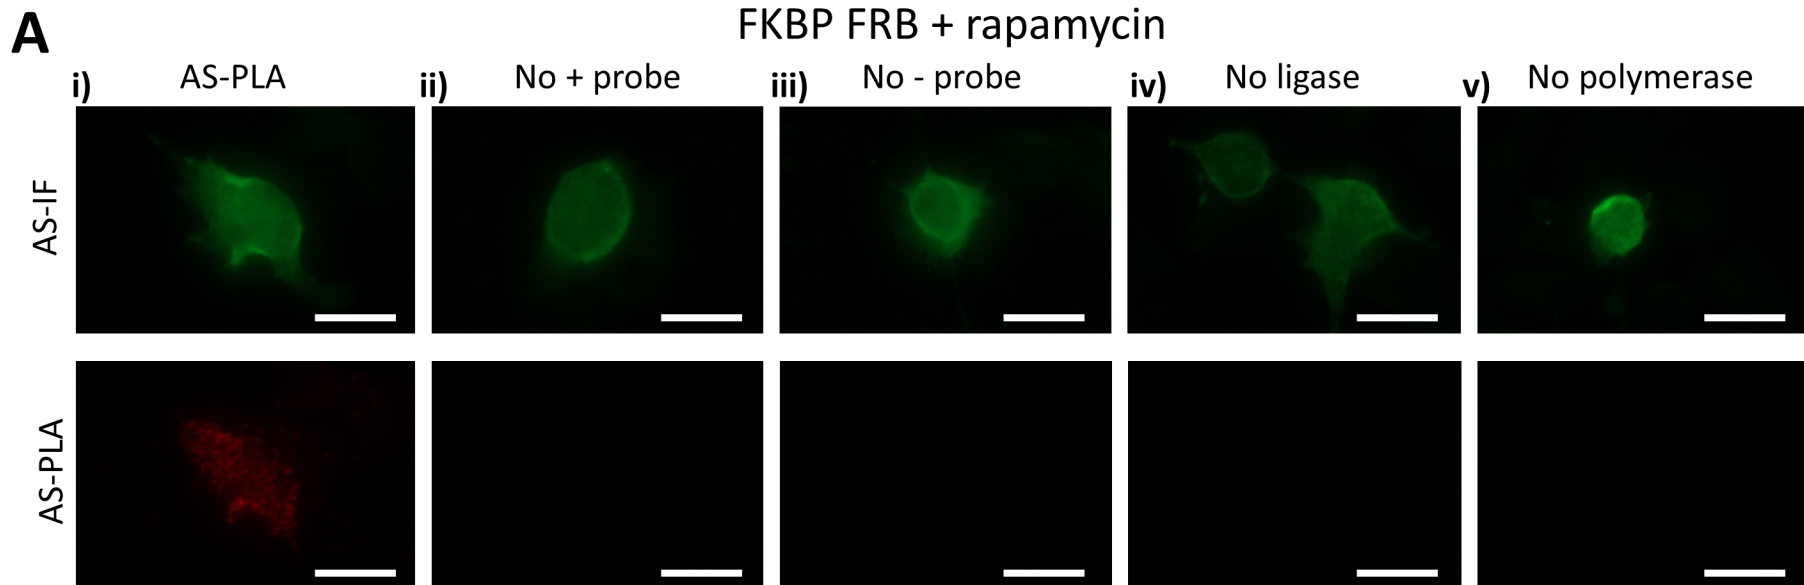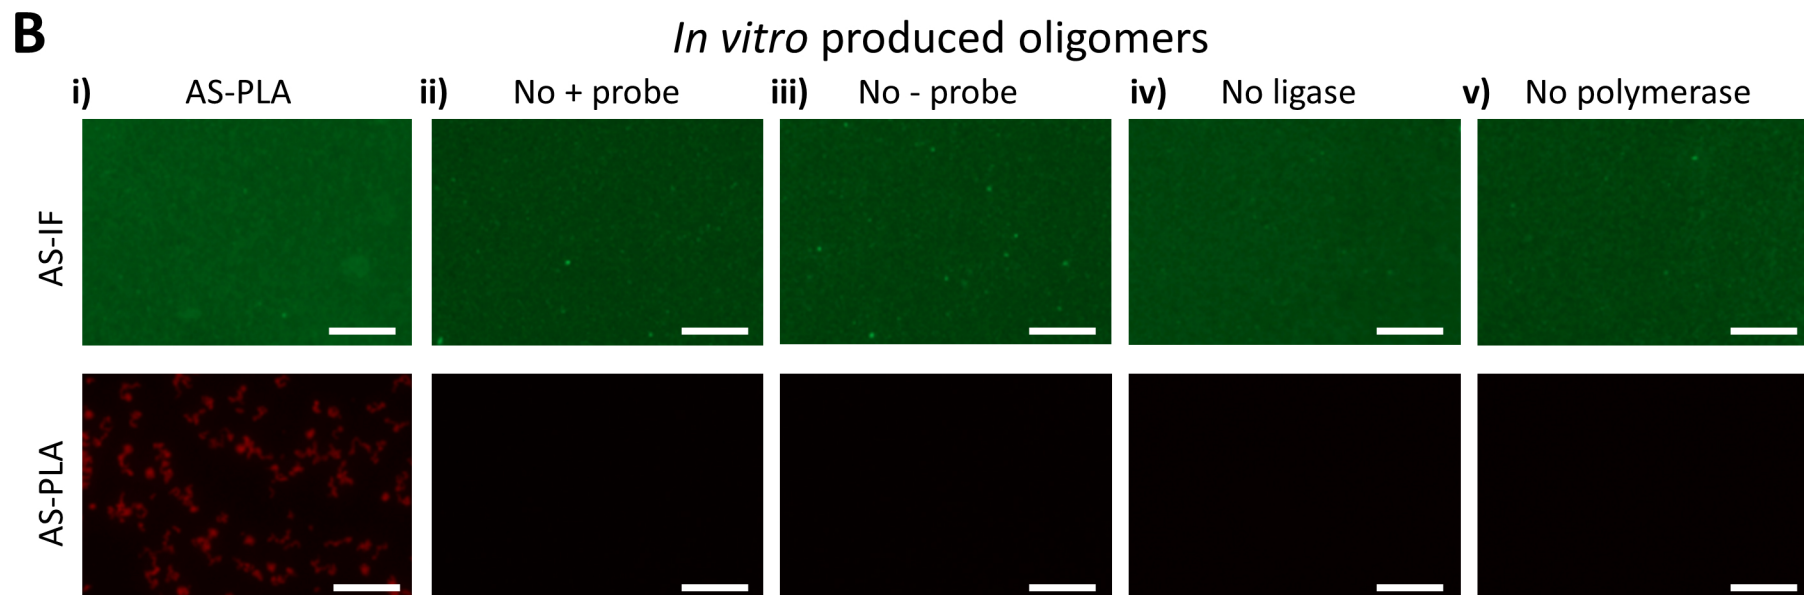

Supplement: SupplementaryFig2.pdf [file SupplementaryFig2.pdf]

## Supplementary Figure 5

**A**

Unmodified syn 211 AS-IHC

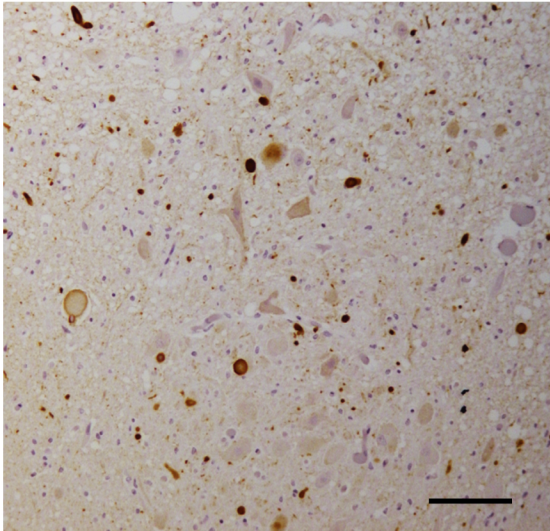

**B**

AS-PLA probe (-) AS-IHC

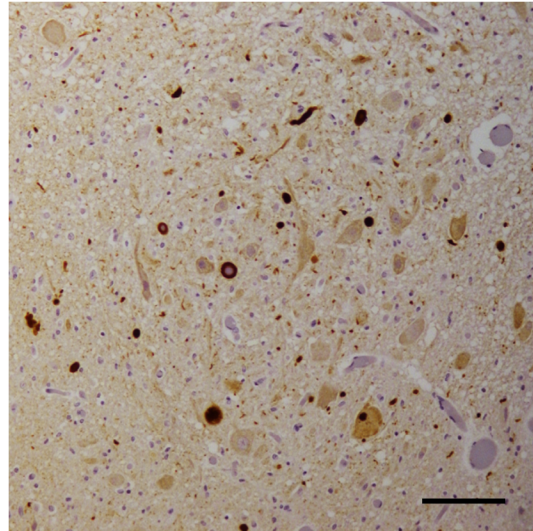

**C**

AS-PLA probe (+) AS-IHC

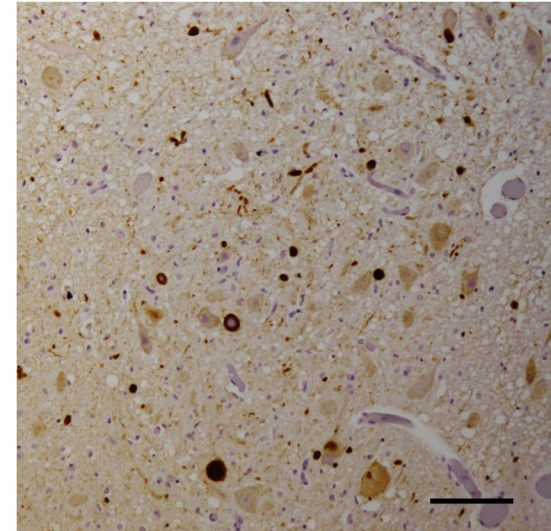

Supplement: SupplementaryFig5.pdf [file SupplementaryFig5.pdf]
